# Supplementary material for: Isothiocyanates induce UGT1A1 in humanized UGT1 mice in a CAR dependent fashion that is highly dependent upon oxidative stress
Source: PubMed Central journal article supplement (PMC5395973; doi:10.1038/srep46489), 2017-04-19

Supplemental Information

***Title: Isothiocyanates induce UGT1A1 in humanized UGT1 mice in a CAR dependent fashion that is highly dependent upon oxidative stress***

***Short title: Cruciferous vegetables and activation of nuclear receptors***

Emiko Yoda<sup>1,2</sup>, Miles Paszek<sup>1</sup>, Camille Konopnicki<sup>1</sup>, Ryoichi Fujiwara<sup>3</sup>, Shujuan Chen<sup>1</sup> and Robert H. Tukey<sup>1,\*</sup>

<sup>1</sup>Laboratory of Environmental Toxicology, Department of Pharmacology, University of California, San Diego, La Jolla, CA 92093.

<sup>2</sup>Division of Health Chemistry, Department of Healthcare and Regulatory Sciences, School of Pharmacy, Showa University, 1-5-8 Hatanodai, Shinagawa-ku, Tokyo 142-8555, Japan.

<sup>3</sup>Department of Pharmaceutics, School of Pharmacy, Kitasato University, 6-9-1 Shirokane, Minato-ku, Tokyo 108-8641, Japan.

## Supplemental Figure 1

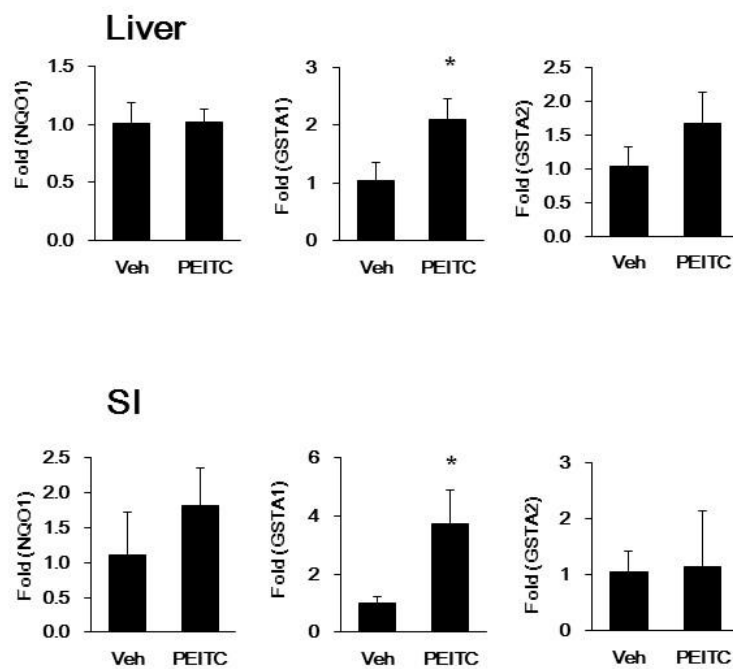

**Supplemental Figure 1.** Analysis of *Nrf2* target genes. Using RNA isolated in Figure 1 (neonatal *hUGT1* mice), gene expression patterns for *Nqo1*, *Gsta1* and *Gsta2* were quantitated by RT-qPCR expressed as Fold induction. Values are the means of  $\pm$  SD (n=3). Statistically significant differences between vehicle (Veh) and PEITC are indicated by asterisks (Student *t* test: \*,  $P < 0.05$ ).

## Supplemental Figure 2

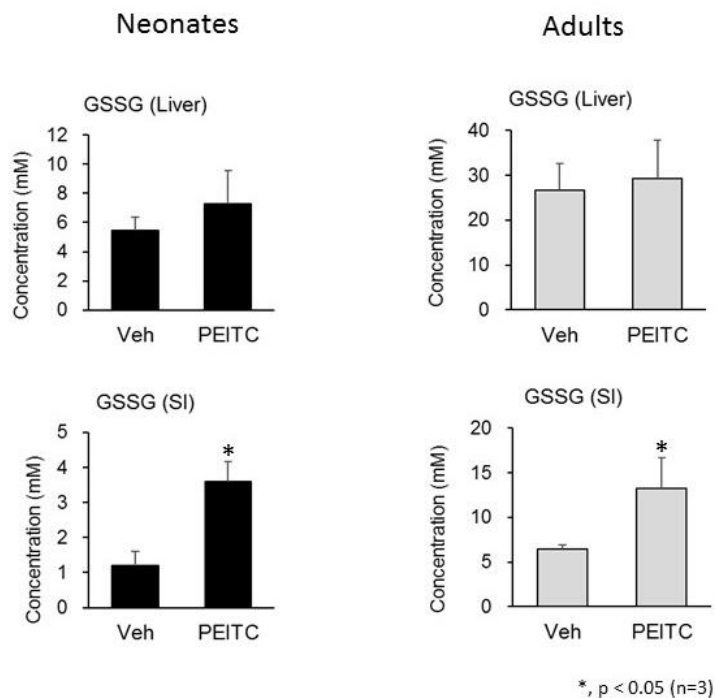

**Supplemental Figure 2.** Oxidative stress following PEITC treatment. **A.** Neonatal *hUGT1* mice were given an oral dose of PEITC (200 mg/kg) and GSSG levels measured in liver and small intestine (SI) after 24 hours. **B.** The same experiment was conducted on adult (6 week old) *hUGT1* mice. Values are the means of  $\pm$  SD (n=3). Statistically significant differences between vehicle (Veh) and PEITC are indicated by asterisks (Student *t* test: \*,  $P < 0.05$ ).

### Supplemental Figure 3

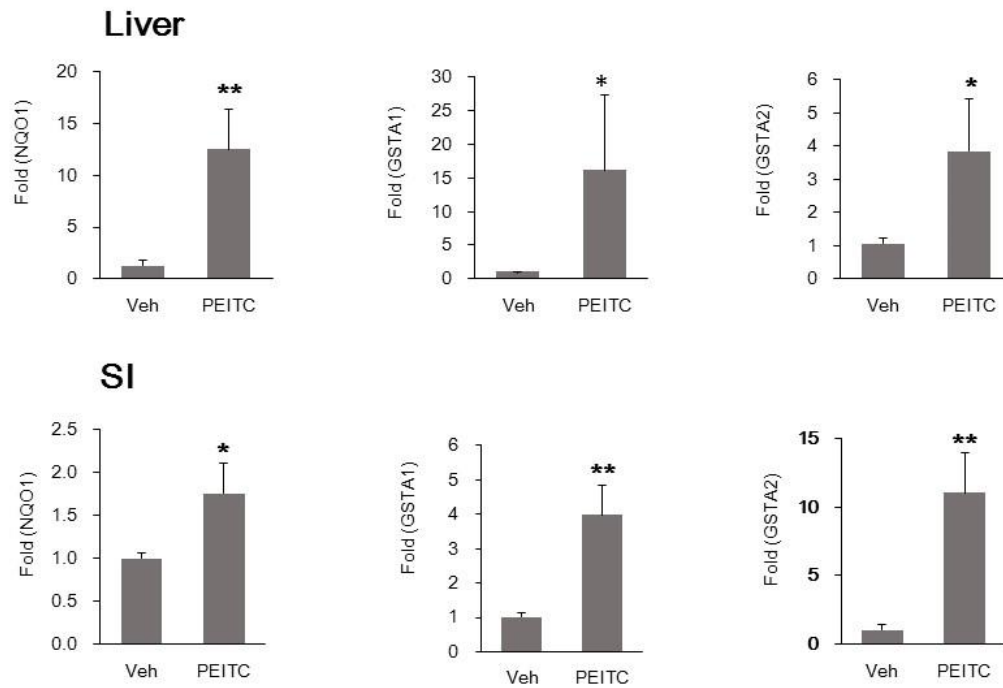

**Supplemental Figure 3.** Impact of PEITC on *Nrf2* target genes in adult mice. RNA prepared from PEITC

treated *hUGT1/Car<sup>+/-</sup>* and *hUGT1/Car<sup>-/-</sup>* mice from liver and small intestine (Figure 4) was used to quantitate *Nqo1*, *Gsta1* and *Gsta2* gene expression by real time PCR. Values are the means of  $\pm$  SD (n>3). Statistically significant differences between vehicle (Veh) and PEITC are indicated by asterisks (Student *t* test: \*,  $P < 0.05$ ; \*\*,  $P < 0.01$ ).

Figure 1

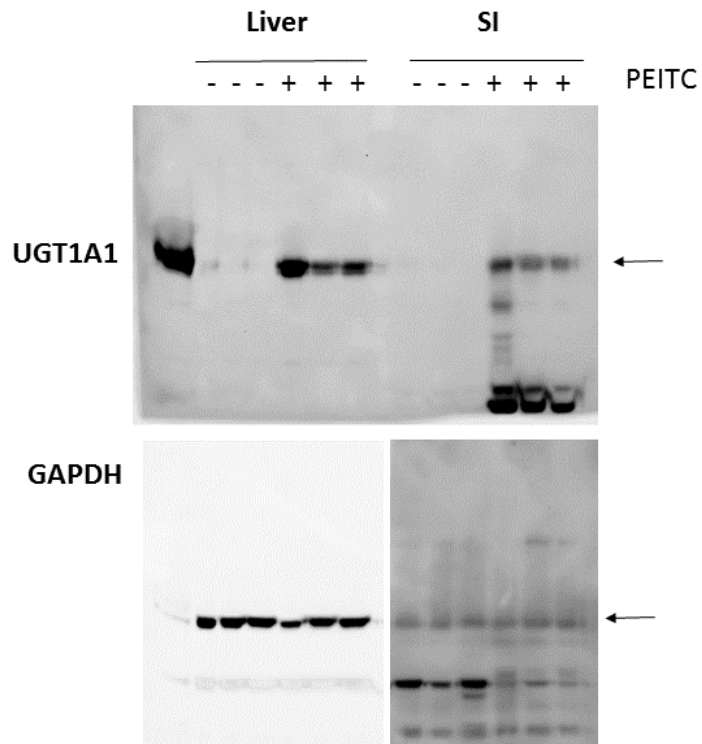

Supplemental Figure 4. Full length Western blot used for Figure 1.

Figure 2

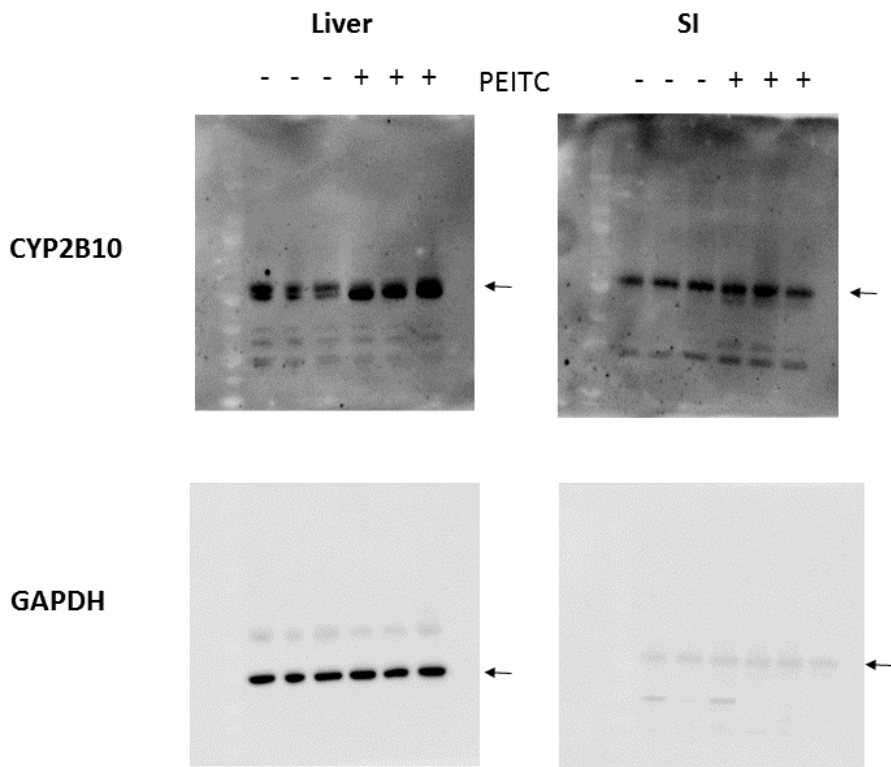

Supplemental Figure 5. Full length Western blots used for Figure 2.

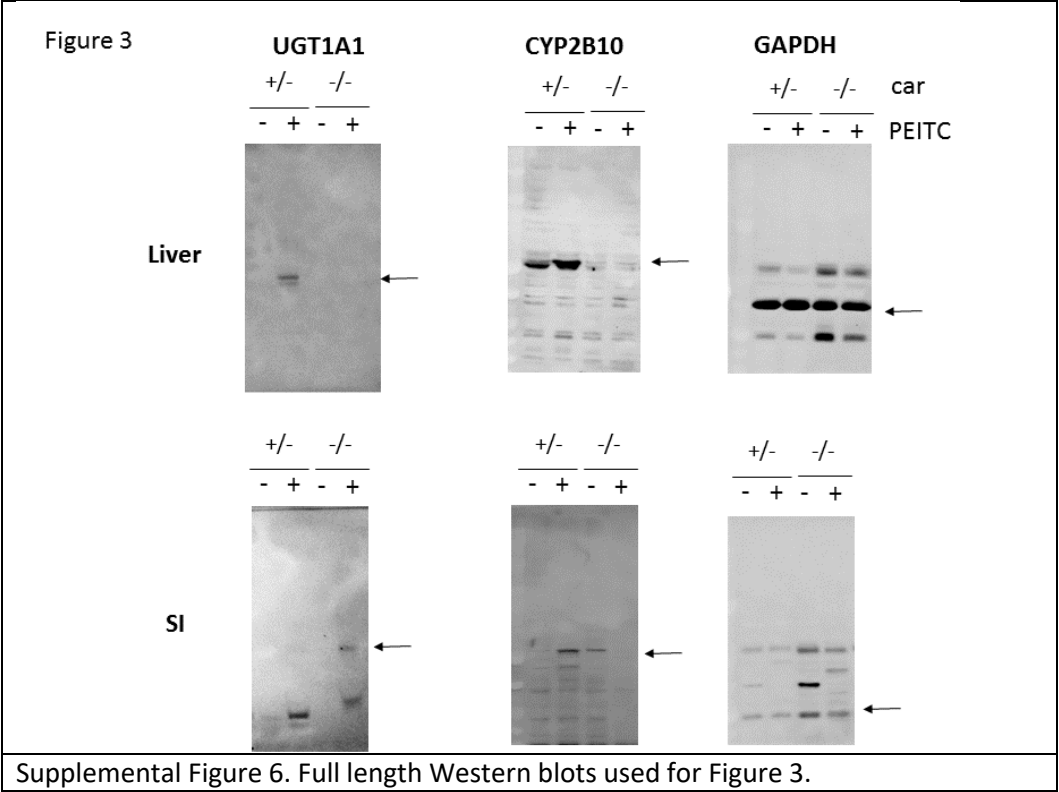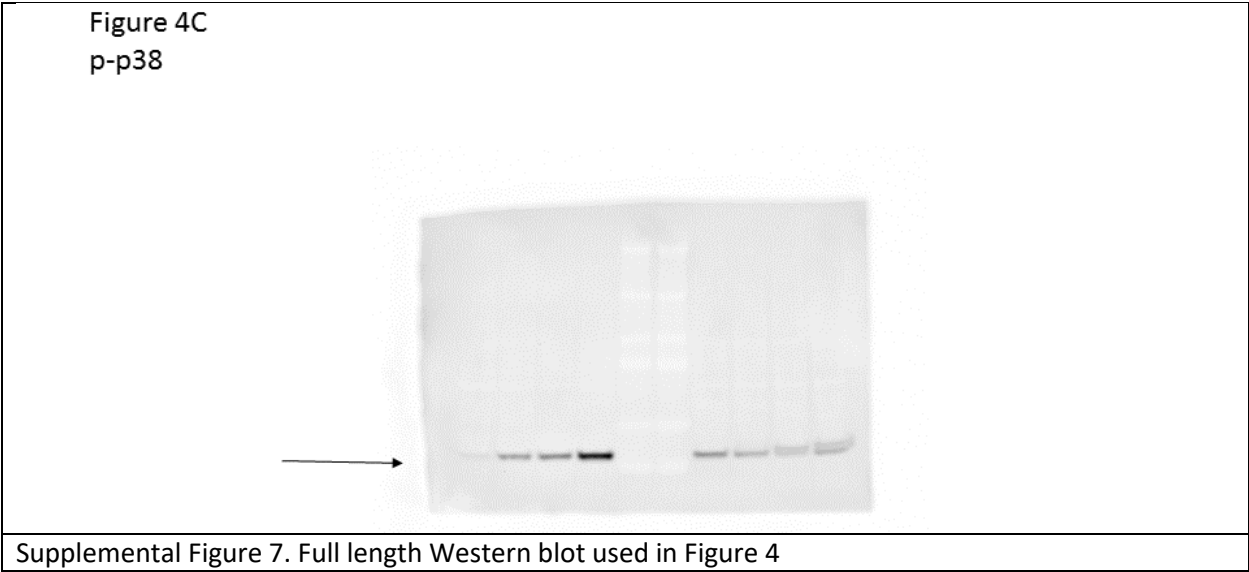

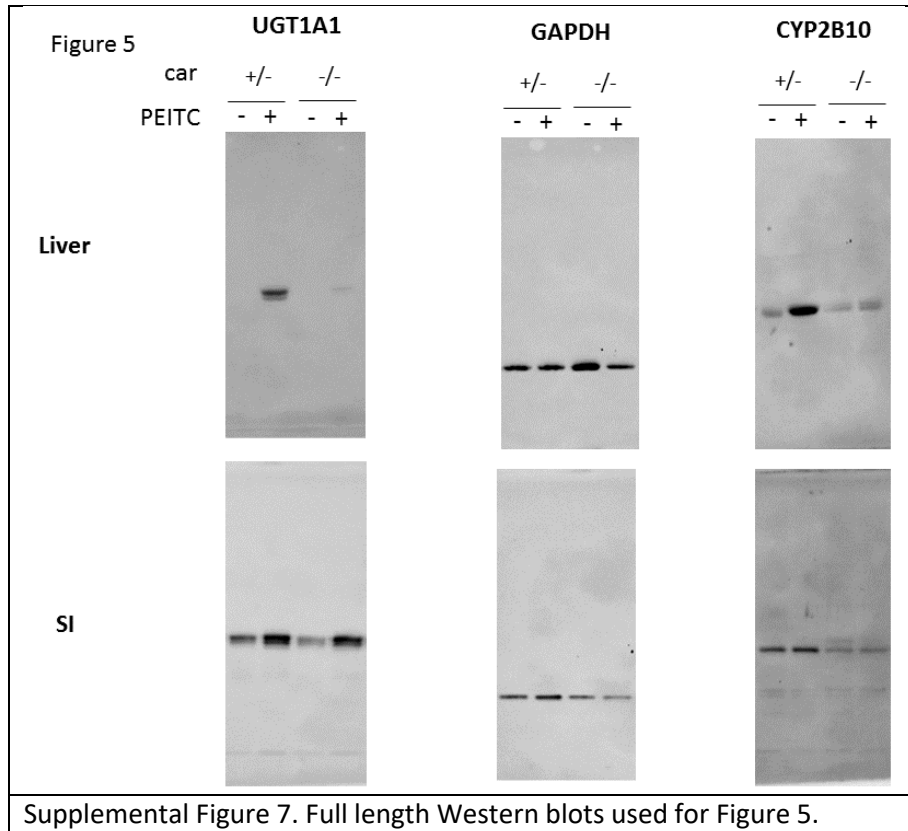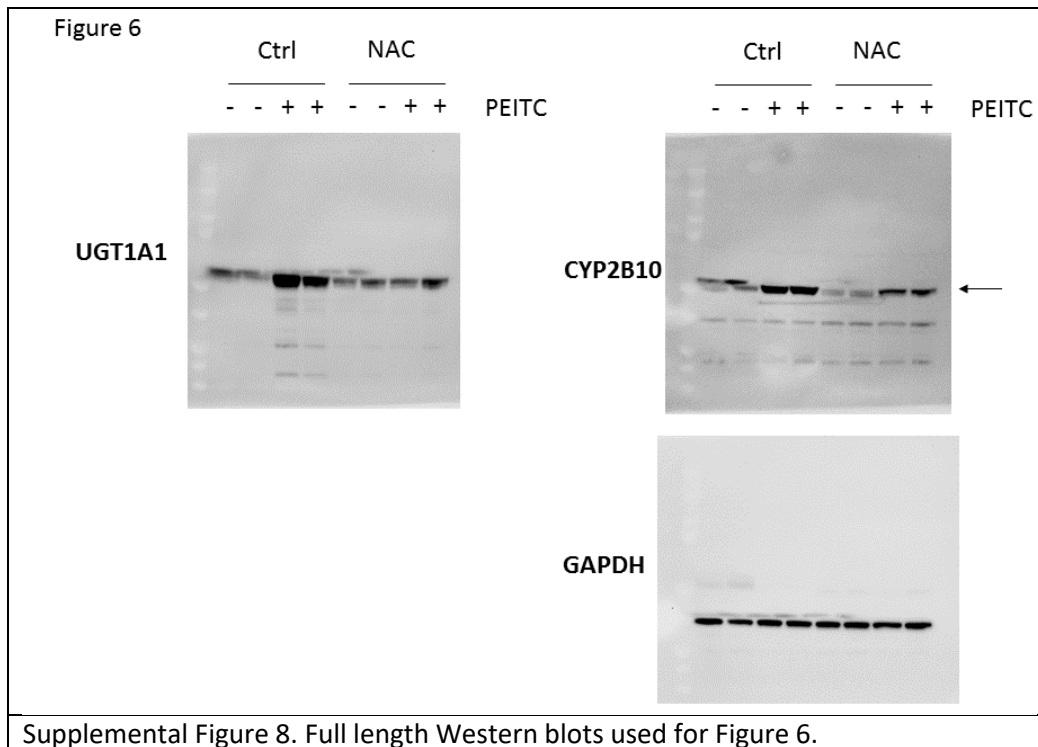

Supplement: srep46489-s1.pdf [file srep46489-s1.pdf]
